# Supplementary material for: Response to COVID-19 phenotyping correspondence
Source: PubMed Central journal article supplement — Eur Respir J. 2020 Aug 27;56(2):2002756. doi: 10.1183/13993003.02756-2020 (PMC7397944; doi:10.1183/13993003.02756-2020), 2020-08-27
Supplement: ERJ-02756-2020.Shareable.pdf [file ERJ-02756-2020.Shareable.pdf]

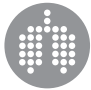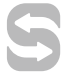

SHAREABLE PDF

AGORA

CORRESPONDENCE

ERJ European Respiratory Journal Eur Respir J 0903-1936/1399-3003 European Respiratory Society 10.1183/13993003.02756-2020 ERJ-02756-2020 AGORA CORRESPONDENCE

Response to COVID-19 phenotyping correspondence CORRESPONDENCE CORRESPONDENCE Response to COVID-19 phenotyping correspondence

Bos Lieve D.J.<sup>1,2</sup>, Sinha Pratik<sup>3,4</sup>, Dickson Robert P.<sup>5,6,7</sup>,

<sup>1</sup>Intensive Care, Amsterdam University Medical Centers, location AMC, University of Amsterdam, Infection and Immunity, Amsterdam, The Netherlands. <sup>2</sup>Dept of Respiratory Medicine, Amsterdam University Medical Centers, location AMC, University of Amsterdam, Infection and Immunity, Amsterdam, The Netherlands. <sup>3</sup>Dept of Medicine, University of California San Francisco, San Francisco, CA, USA. <sup>4</sup>Dept of Anesthesia, University of California San Francisco, San Francisco, CA, USA. <sup>5</sup>Division of Pulmonary and Critical Care Medicine, Dept of Internal Medicine, University of Michigan Medical School, Ann Arbor, MI, USA. <sup>6</sup>Dept of Microbiology and Immunology, University of Michigan Medical School, Ann Arbor, MI, USA. <sup>7</sup>Michigan Center for Integrative Research in Critical Care, Ann Arbor, MI, USA.

**Correspondence:** Lieve D.J. Bos, Intensive Care, Amsterdam University Medical Centers, location AMC, University of Amsterdam, Infection and Immunity, Meibergdreef 9, G3-226, Amsterdam, 1105AZ, The Netherlands.

E-mail: l.d.bos@amsterdamumc.nl 2020202056013072020170720202020

#### *From the authors:*

In their letter, R. Cherian and co-workers take issue with our interpretation of the respiratory physiology of coronavirus disease 2019 (COVID-19), arguing that it is based merely on “small cohort studies”, and instead declaring that “a high proportion of mechanically ventilated COVID-19 patients exhibit near-normal lung compliance”. Yet the low respiratory compliance of COVID-19 patients has now been extensively demonstrated by studies totalling more than 800 COVID-19 patients [1–7], including a direct comparison with non-COVID-19 acute respiratory distress syndrome (ARDS) patients that revealed no difference in respiratory compliance [7]. In contrast, the three case series cited by R. Cherian and co-workers in support of their claim comprise cohorts of, respectively, 16, 10 and 26 patients [8–10]. Furthermore, even these case series report average respiratory compliance in COVID-19 of 40–45 mL·cmH<sub>2</sub>O<sup>−1</sup>, which is in fact abnormal and far from “near-normal compliance” [11, 12]. As an informative comparison, the ANZICS (Australian and New Zealand Intensive Care Society) cohort of ARDS patients used to derive the Berlin definition of ARDS had an average respiratory compliance of 40±15 mL·cmH<sub>2</sub>O<sup>−1</sup> [13]. We thus find no evidence in the authors’ citations (or elsewhere) to support their empirical claim that many or most COVID-19 patients present with “normal” or “near-normal” respiratory compliance.
